# Supplementary material for: COVID-19 and The Impact of Climatic Parameters: A Case Study of Bangladesh
Source: Research Square preprint supplement (doi:10.21203/rs.3.rs-630089/v1), 2021-07-13
Supplement: Supplementary file 1 [file e5bcc17f8241c258728fb04f.xlsx]

## Sheet: Sheet1
DATE	Lab Test	Covid	Temrerature	Humadity	PM 2.5	Aqi	human index	PD	lnpm	lnaqi	lncovid	lnpd	aqi%	Wind speed	lnwind	lntep	lnhum
2020-05-01	5573	571	30	59	108	178	0.632	1265	4.68213	5.18178	6.34739	7.14283	0	14.7	2.68785	3.4012	4.07754
2020-05-02	5827	552	29	62	130	189	0.613	1200	4.86753	5.24175	6.31355	7.09008	6.17978	14.5	2.67415	3.3673	4.12713
2020-05-03	5368	665	30	59	110	179	0.62	1205	4.70048	5.18739	6.49979	7.09423	-5.29101	14.8	2.69463	3.4012	4.07754
2020-05-04	6260	688	30	64	95	171	0.538	1207	4.55388	5.14166	6.53379	7.09589	-4.46927	14.9	2.70136	3.4012	4.15888
2020-05-05	5711	786	29	59	142	196	0.586	1211	4.95583	5.27811	6.66696	7.0992	14.6199	14.9	2.70136	3.3673	4.07754
2020-05-06	6241	790	30	59	85	166	0.672	1256	4.44265	5.11199	6.67203	7.13569	-15.3061	15	2.70805	3.4012	4.07754
2020-05-07	5867	706	30	65	90	169	0.614	1209	4.49981	5.1299	6.55962	7.09755	1.80723	15.1	2.71469	3.4012	4.17439
2020-05-08	5941	709	31	59	150	200	0.632	1225	5.01064	5.29832	6.56386	7.1107	18.3432	15.2	2.7213	3.43399	4.07754
2020-05-09	5465	636	30	59	132	190	0.648	1227	4.8828	5.24702	6.4552	7.11233	-5	15.3	2.72785	3.4012	4.07754
2020-05-10	5638	887	30	66	147	198	0.61	1254	4.99043	5.28827	6.78784	7.13409	4.21053	15.3	2.72785	3.4012	4.18965
2020-05-11	7208	1034	31	59	145	197	0.695	1241	4.97673	5.2832	6.94119	7.12367	-0.505051	15.4	2.73437	3.43399	4.07754
2020-05-12	6773	969	30	59	133	191	0.614	1231	4.89035	5.25227	6.87626	7.11558	-3.04569	15.4	2.73437	3.4012	4.07754
2020-05-13	7900	1162	30	67	139	194	0.596	1242	4.93447	5.26786	7.0579	7.12448	1.57068	14.6	2.68102	3.4012	4.20469
2020-05-14	7392	1041	31	59	129	189	0.596	1256	4.85981	5.24175	6.94794	7.13569	-2.57732	15.6	2.74727	3.43399	4.07754
2020-05-15	8582	1202	31	59	98	173	0.596	1245	4.58497	5.15329	7.09174	7.12689	-8.46561	15.5	2.74084	3.43399	4.07754
2020-05-16	6782	930	32	64	86	167	0.649	1206	4.45435	5.11799	6.83518	7.09506	-3.46821	14.6	2.68102	3.46574	4.15888
2020-05-17	8184	1273	32	59	99	173	0.635	1209	4.59512	5.15329	7.14913	7.09755	3.59281	15.6	2.74727	3.46574	4.07754
2020-05-18	9788	1602	31	59	134	192	0.631	1289	4.89784	5.2575	7.37901	7.16162	10.9827	15.9	2.76632	3.43399	4.07754
2020-05-19	8449	1251	32	68	134	192	0.535	1285	4.89784	5.2575	7.1317	7.15851	0	15.9	2.76632	3.46574	4.21951
2020-05-20	10207	1617	32	59	134	192	0.574	1274	4.89784	5.2575	7.38833	7.14992	0	15.8	2.76001	3.46574	4.07754
2020-05-21	10262	1773	31	59	134	192	0.622	1206	4.89784	5.2575	7.48043	7.09506	0	16	2.77259	3.43399	4.07754
2020-05-22	9727	1694	32	64	134	192	0.593	1204	4.89784	5.2575	7.43485	7.0934	0	16.1	2.77882	3.46574	4.15888
2020-05-23	10834	1873	32	59	134	192	0.562	1224	4.89784	5.2575	7.5353	7.10988	0	16.5	2.80336	3.46574	4.07754
2020-05-24	8908	1532	31	59	134	192	0.591	1225	4.89784	5.2575	7.33433	7.1107	0	15.9	2.76632	3.43399	4.07754
2020-05-25	9451	1975	32	64	61	154	0.591	1235	4.11087	5.03695	7.58832	7.11883	-19.7917	16.8	2.82138	3.46574	4.15888
2020-05-26	5407	1166	32	59	74	161	0.588	1223	4.30407	5.0814	7.06133	7.10906	4.54545	16.5	2.80336	3.46574	4.07754
2020-05-27	8015	1541	31	59	88	168	0.554	1233	4.47734	5.12396	7.34019	7.11721	4.34783	15.8	2.76001	3.43399	4.07754
2020-05-28	9310	2029	32	60	71	169	0.559	1223	4.26268	5.1299	7.6153	7.10906	0.595238	16.8	2.82138	3.46574	4.09434
2020-05-29	11301	2523	32	59	89	168	0.652	1213	4.48864	5.12396	7.8332	7.10085	-0.591716	16.9	2.82731	3.46574	4.07754
2020-05-30	9987	1764	32	59	90	169	0.587	1253	4.49981	5.1299	7.47534	7.1333	0.595238	17.2	2.84491	3.46574	4.07754
2020-05-31	11876	2545	33	59	103	176	0.573	1263	4.63473	5.17048	7.84189	7.14125	4.14201	17.5	2.8622	3.49651	4.07754
2020-06-01	11439	2381	33	71	86	167	0.541	1211	4.45435	5.11799	7.77528	7.0992	-5.11364	17.1	2.83908	3.49651	4.26268
2020-06-02	12704	2911	33	70	84	166	0.632	1221	4.43082	5.11199	7.97625	7.10743	-0.598802	17.5	2.8622	3.49651	4.2485
2020-06-03	12510	2695	32	71	99	173	0.615	1231	4.59512	5.15329	7.89915	7.11558	4.21687	18.5	2.91777	3.46574	4.26268
2020-06-04	12694	2423	33	71	90	169	0.605	1241	4.49981	5.1299	7.79276	7.12367	-2.31214	18.1	2.89591	3.49651	4.26268
2020-06-05	14088	2828	33	78	128	188	0.534	1251	4.85203	5.23644	7.94733	7.1317	11.2426	17.8	2.8792	3.49651	4.35671
2020-06-06	12486	2635	32	71	131	190	0.582	1241	4.8752	5.24702	7.87664	7.12367	1.06383	18.6	2.92316	3.46574	4.26268
2020-06-07	13136	2743	33	74	143	196	0.666	1253	4.96284	5.27811	7.91681	7.1333	3.15789	18.4	2.91235	3.49651	4.30407
2020-06-08	12944	2735	33	71	115	182	0.609	1245	4.74493	5.20401	7.91389	7.12689	-7.14286	18.2	2.90142	3.49651	4.26268
2020-06-09	14668	3171	32	76	92	170	0.627	1238	4.52179	5.1358	8.0618	7.12125	-6.59341	18.6	2.92316	3.46574	4.33073
2020-06-10	15965	3190	33	71	73	160	0.643	1248	4.29046	5.07517	8.06778	7.1293	-5.88235	18.7	2.92852	3.49651	4.26268
2020-06-11	15772	3187	33	71	77	162	0.605	1234	4.34381	5.0876	8.06684	7.11802	1.25	18.4	2.91235	3.49651	4.26268
2020-06-12	15990	3471	34	77	87	167	0.689	1269	4.46591	5.11799	8.1522	7.14598	3.08642	20.3	3.01062	3.52636	4.34381
2020-06-13	16638	2856	33	71	97	172	0.61	1243	4.57471	5.14749	7.95718	7.12528	2.99401	18.9	2.93916	3.49651	4.26268
2020-06-14	14505	3141	33	71	101	174	0.591	1246	4.61512	5.15906	8.0523	7.12769	1.16279	21.1	3.04927	3.49651	4.26268
2020-06-15	15038	3099	32	78	93	170	0.644	1216	4.5326	5.1358	8.03883	7.10332	-2.29885	21.2	3.054	3.46574	4.35671
2020-06-16	17214	3862	33	71	75	161	0.631	1219	4.31749	5.0814	8.25894	7.10579	-5.29412	21.5	3.06805	3.49651	4.26268
2020-06-17	17527	4008	33	71	90	169	0.531	1218	4.49981	5.1299	8.29605	7.10497	4.96894	21.6	3.07269	3.49651	4.26268
2020-06-18	16259	3803	32	79	86	167	0.569	1224	4.45435	5.11799	8.24355	7.10988	-1.18343	21.8	3.08191	3.46574	4.36945
2020-06-19	15045	3243	33	71	78	163	0.618	1229	4.35671	5.09375	8.08425	7.11396	-2.39521	21.9	3.08649	3.49651	4.26268
2020-06-20	14031	3240	33	71	88	168	0.588	1242	4.47734	5.12396	8.08333	7.12448	3.06748	21.3	3.05871	3.49651	4.26268
2020-06-21	15585	3531	32	75	94	171	0.557	1253	4.54329	5.14166	8.16934	7.1333	1.78571	21.4	3.06339	3.46574	4.31749
2020-06-22	15555	3480	33	71	79	163	0.586	1210	4.36945	5.09375	8.15479	7.09838	-4.67836	21.4	3.06339	3.49651	4.26268
2020-06-23	16292	3412	33	71	76	162	0.592	1209	4.33073	5.0876	8.13505	7.09755	-0.613497	22.1	3.09558	3.49651	4.26268
2020-06-24	16433	3462	32	76	66	156	0.572	1245	4.18965	5.04986	8.1496	7.12689	-3.7037	22.1	3.09558	3.46574	4.33073
2020-06-25	17999	3946	33	71	51	139	0.601	1255	3.93183	4.93447	8.28046	7.13489	-10.8974	22.1	3.09558	3.49651	4.26268
2020-06-26	18498	3868	33	71	97	172	0.609	1233	4.57471	5.14749	8.26049	7.11721	23.741	21.3	3.05871	3.49651	4.26268
2020-06-27	15157	3504	32	73	102	175	0.627	1258	4.62497	5.16479	8.16166	7.13728	1.74419	22.2	3.10009	3.46574	4.29046
2020-06-28	18099	3809	33	71	98	173	0.643	1233	4.58497	5.15329	8.24512	7.11721	-1.14286	22.5	3.11352	3.49651	4.26268
2020-06-29	17837	4014	33	71	90	169	0.605	1246	4.49981	5.1299	8.29754	7.12769	-2.31214	23.1	3.13983	3.49651	4.26268
2020-06-30	18426	3682	32	72	87	167	0.689	1216	4.46591	5.11799	8.21121	7.10332	-1.18343	22.1	3.09558	3.46574	4.27667
2020-07-01	17875	3775	32	76	78	163	0.61	1219	4.35671	5.09375	8.23616	7.10579	-2.39521	22.1	3.09558	3.46574	4.33073
2020-07-02	18362	4019	33	76	58	152	0.591	1218	4.06044	5.02388	8.29879	7.10497	-6.74847	22.3	3.10459	3.49651	4.33073
2020-07-03	14650	3114	32	78	75	161	0.644	1224	4.31749	5.0814	8.04366	7.10988	5.92105	22.4	3.10906	3.46574	4.35671
2020-07-04	14727	3288	32	76	95	171	0.631	1229	4.55388	5.14166	8.09803	7.11396	6.21118	22.6	3.11795	3.46574	4.33073
2020-07-05	13988	2738	33	76	103	176	0.622	1242	4.63473	5.17048	7.91498	7.12448	2.92398	21.1	3.04927	3.49651	4.33073
2020-07-06	14245	3201	32	74	75	161	0.593	1253	4.31749	5.0814	8.07122	7.1333	-8.52273	21.1	3.04927	3.46574	4.30407
2020-07-07	13173	3027	32	76	61	154	0.562	1210	4.11087	5.03695	8.01533	7.09838	-4.34783	21.3	3.05871	3.46574	4.33073
2020-07-08	15672	3489	32	76	69	158	0.591	1209	4.23411	5.0626	8.15737	7.09755	2.5974	22.4	3.10906	3.46574	4.33073
2020-07-09	15632	3360	31	72	122	185	0.591	1255	4.80402	5.22036	8.1197	7.13489	17.0886	21.3	3.05871	3.43399	4.27667
2020-07-10	13488	2949	32	76	71	159	0.588	1233	4.26268	5.0689	7.98922	7.11721	-14.0541	20.1	3.00072	3.46574	4.33073
2020-07-11	11193	2686	32	76	56	151	0.554	1235	4.02535	5.01728	7.89581	7.11883	-5.03145	20.5	3.02042	3.46574	4.33073
2020-07-12	11059	2666	31	76	59	153	0.559	1233	4.07754	5.03044	7.88833	7.11721	1.3245	21.1	3.04927	3.43399	4.33073
2020-07-13	12423	3099	32	79	101	174	0.652	1246	4.61512	5.15906	8.03883	7.12769	13.7255	21.3	3.05871	3.46574	4.36945
2020-07-14	13453	3163	32	76	136	193	0.587	1216	4.91265	5.26269	8.05928	7.10332	10.9195	21.4	3.06339	3.46574	4.33073
2020-07-15	14002	3533	31	76	96	172	0.573	1219	4.56435	5.14749	8.1699	7.10579	-10.8808	20.8	3.03495	3.43399	4.33073
2020-07-16	12889	2733	32	76	114	181	0.632	1218	4.7362	5.1985	7.91316	7.10497	5.23256	21.1	3.04927	3.46574	4.33073
2020-07-17	13460	3034	31	80	97	172	0.613	1253	4.57471	5.14749	8.01764	7.1333	-4.97238	20.6	3.02529	3.43399	4.38203
2020-07-18	10923	2709	31	76	93	170	0.62	1210	4.5326	5.1358	7.90433	7.09838	-1.16279	20.4	3.01553	3.43399	4.33073
2020-07-19	10625	2459	31	76	76	162	0.538	1209	4.33073	5.0876	7.80751	7.09755	-4.70588	19.8	2.98568	3.43399	4.33073
2020-07-20	13362	2928	30	75	62	154	0.586	1245	4.12713	5.03695	7.98207	7.12689	-4.93827	20.1	3.00072	3.4012	4.31749
2020-07-21	12898	3057	31	76	79	163	0.672	1255	4.36945	5.09375	8.02519	7.13489	5.84416	21.3	3.05871	3.43399	4.33073
2020-07-22	12050	2744	30	76	90	169	0.614	1244	4.49981	5.1299	7.91717	7.12609	3.68098	20.4	3.01553	3.4012	4.33073
2020-07-23	12398	2856	31	74	89	168	0.632	1225	4.48864	5.12396	7.95718	7.1107	-0.591716	21.3	3.05871	3.43399	4.30407
2020-07-24	12027	2548	31	76	109	179	0.648	1233	4.69135	5.18739	7.84306	7.11721	6.54762	20.5	3.02042	3.43399	4.33073
2020-07-25	10446	2520	31	73	85	166	0.61	1246	4.44265	5.11199	7.83201	7.12769	-7.26257	19.6	2.97553	3.43399	4.29046
2020-07-26	10078	2275	30	76	103	176	0.695	1216	4.63473	5.17048	7.72974	7.10332	6.0241	19.8	2.98568	3.4012	4.33073
2020-07-27	12859	2772	31	76	93	170	0.614	1219	4.5326	5.1358	7.92732	7.10579	-3.40909	18.2	2.90142	3.43399	4.33073
2020-07-28	12714	2960	31	75	84	166	0.596	1218	4.43082	5.11199	7.99294	7.10497	-2.35294	20.3	3.01062	3.43399	4.31749
2020-07-29	14127	3009	30	76	117	183	0.596	1224	4.76217	5.20949	8.00936	7.10988	10.241	20.5	3.02042	3.4012	4.33073
2020-07-30	12937	2695	31	76	111	180	0.591	1229	4.70953	5.19296	7.89915	7.11396	-1.63934	20.4	3.01553	3.43399	4.33073
2020-07-31	12614	2772	31	74	64	155	0.588	1242	4.15888	5.04343	7.92732	7.12448	-13.8889	20.5	3.02042	3.43399	4.30407
2020-08-01	8802	2199	30	75	57	152	0.554	1253	4.04305	5.02388	7.69576	7.1333	-1.93548	19.6	2.97553	3.4012	4.31749
2020-08-02	8624	2000	30	73	68	157	0.559	1210	4.21951	5.05625	6.78672	7.09838	3.28947	19.3	2.96011	3.4012	4.29046
2020-08-03	8724	2200	30	75	86	167	0.652	1209	4.45435	5.11799	7.21229	7.09755	6.36943	18.3	2.9069	3.4012	4.31749
2020-08-04	8624	2000	29	75	107	178	0.587	1250	4.67283	5.18178	7.55904	7.1309	6.58683	18.5	2.91777	3.3673	4.31749
2020-08-05	11160	2654	30	72	103	176	0.573	1233	4.63473	5.17048	7.88382	7.11721	-1.1236	20.1	3.00072	3.4012	4.27667
2020-08-06	12708	2977	30	75	28	84	0.632	1246	3.3322	4.43082	7.99867	7.12769	-52.2727	18.6	2.92316	3.4012	4.31749
2020-08-07	12699	2851	30	75	54	147	0.613	1216	3.98898	4.99043	7.95543	7.10332	75	19.3	2.96011	3.4012	4.31749
2020-08-08	11737	2611	29	75	74	161	0.62	1219	4.30407	5.0814	7.86749	7.10579	9.52381	19.4	2.96527	3.3673	4.31749
2020-08-09	10759	2487	30	73	91	169	0.538	1218	4.51086	5.1299	7.81883	7.10497	4.96894	18.5	2.91777	3.4012	4.29046
2020-08-10	12849	2907	30	75	69	158	0.586	1224	4.23411	5.0626	7.97488	7.10988	-6.50888	19.6	2.97553	3.4012	4.31749
2020-08-11	14820	2996	30	75	88	168	0.672	1229	4.47734	5.12396	8.00503	7.11396	6.32911	20.1	3.00072	3.4012	4.31749
2020-08-12	14751	2995	29	72	95	171	0.614	1242	4.55388	5.14166	8.0047	7.12448	1.78571	20.5	3.02042	3.3673	4.27667
2020-08-13	13162	2617	30	75	74	161	0.632	1253	4.30407	5.0814	7.86978	7.1333	-5.84795	20.5	3.02042	3.4012	4.31749
2020-08-14	12856	2766	30	75	101	174	0.648	1265	4.61512	5.15906	7.92516	7.14283	8.07453	20.6	3.02529	3.4012	4.31749
2020-08-15	12891	2644	30	74	74	161	0.61	1200	4.30407	5.0814	7.88005	7.09008	-7.47126	21.2	3.054	3.4012	4.30407
2020-08-16	10018	2024	29	75	40	112	0.695	1205	3.68888	4.7185	7.61283	7.09423	-30.4348	21.3	3.05871	3.3673	4.31749
2020-08-17	12523	2595	30	75	57	152	0.596	1207	4.04305	5.02388	7.86134	7.09589	35.7143	22.4	3.10906	3.4012	4.31749
2020-08-18	14630	3200	29	76	88	168	0.596	1211	4.47734	5.12396	8.07091	7.0992	10.5263	20.6	3.02529	3.3673	4.33073
2020-08-19	14678	2747	29	75	74	161	0.596	1256	4.30407	5.0814	7.91826	7.13569	-4.16667	18.9	2.93916	3.3673	4.31749
2020-08-20	14059	2868	28	75	62	154	0.649	1209	4.12713	5.03695	7.96137	7.09755	-4.34783	19.6	2.97553	3.3322	4.31749
2020-08-21	12943	2401	29	77	47	129	0.635	1225	3.85015	4.85981	7.78364	7.1107	-16.2338	19.5	2.97041	3.3673	4.34381
2020-08-22	11356	2265	29	75	68	157	0.631	1227	4.21951	5.05625	7.72533	7.11233	21.7054	20.1	3.00072	3.3673	4.31749
2020-08-23	10801	1973	29	75	117	183	0.535	1254	4.76217	5.20949	7.58731	7.13409	16.5605	20.4	3.01553	3.3673	4.31749
2020-08-24	13382	2485	28	76	99	173	0.574	1241	4.59512	5.15329	7.81803	7.12367	-5.46448	18.7	2.92852	3.3322	4.33073
2020-08-25	14153	2545	29	75	103	176	0.622	1231	4.63473	5.17048	7.84189	7.11558	1.7341	19.3	2.96011	3.3673	4.31749
2020-08-26	15070	2519	29	75	33	95	0.593	1242	3.49651	4.55388	7.83162	7.12448	-46.0227	19.6	2.97553	3.3673	4.31749
2020-08-27	15124	2436	28	74	52	142	0.562	1256	3.95124	4.95583	7.79811	7.13569	49.4737	18.2	2.90142	3.3322	4.30407
2020-08-28	13741	2211	29	75	87	167	0.591	1245	4.46591	5.11799	7.7012	7.12689	17.6056	18.7	2.92852	3.3673	4.31749
2020-08-29	11689	2131	29	76	110	179	0.591	1206	4.70048	5.18739	7.66435	7.09506	7.18563	19.8	2.98568	3.3673	4.33073
2020-08-30	11934	1897	29	75	82	165	0.588	1209	4.40672	5.10595	7.54803	7.09755	-7.82123	20.1	3.00072	3.3673	4.31749
2020-08-31	12454	2174	30	75	114	181	0.554	1289	4.7362	5.1985	7.68432	7.16162	9.69697	20.4	3.01553	3.4012	4.31749
2020-09-01	12209	1950	29	78	118	183	0.559	1285	4.77068	5.20949	7.57558	7.15851	1.10497	19.7	2.98062	3.3673	4.35671
2020-09-02	15204	2582	29	75	114	181	0.652	1274	4.7362	5.1985	7.85632	7.14992	-1.0929	19.7	2.98062	3.3673	4.31749
2020-09-03	14422	2158	29	75	99	173	0.601	1111	4.59512	5.15329	7.67694	7.01302	-4.41989	19.3	2.96011	3.3673	4.31749
2020-09-04	13073	1929	30	79	94	171	0.609	1258	4.54329	5.14166	7.56476	7.13728	-1.15607	19.5	2.97041	3.4012	4.36945
2020-09-05	12847	1950	29	75	75	161	0.627	1169	4.31749	5.0814	7.57558	7.0639	-5.84795	19.6	2.97553	3.3673	4.31749
2020-09-06	11354	1592	29	72	78	163	0.643	1174	4.35671	5.09375	7.37275	7.06817	1.24224	18.7	2.92852	3.3673	4.27667
2020-09-07	15412	2202	29	75	66	156	0.605	1189	4.18965	5.04986	7.69712	7.08087	-4.29448	18.9	2.93916	3.3673	4.31749
2020-09-08	14973	1892	29	75	59	153	0.689	1153	4.07754	5.03044	7.54539	7.05012	-1.92308	17.5	2.8622	3.3673	4.31749
2020-09-09	14755	1827	30	73	77	162	0.61	1196	4.34381	5.0876	7.51043	7.08674	5.88235	17.6	2.8679	3.4012	4.29046
2020-09-10	15559	1892	29	75	141	195	0.591	1178	4.94876	5.273	7.54539	7.07157	20.3704	17.8	2.8792	3.3673	4.31749
2020-09-11	14747	1792	29	75	109	179	0.644	1185	4.69135	5.18739	7.49109	7.0775	-8.20513	17.9	2.8848	3.3673	4.31749
2020-09-12	10723	1282	30	74	76	162	0.631	1163	4.33073	5.0876	7.15618	7.05876	-9.49721	16.5	2.80336	3.4012	4.30407
2020-09-13	12999	1476	29	75	82	165	0.622	1145	4.40672	5.10595	7.29709	7.04316	1.85185	16.3	2.79117	3.3673	4.31749
2020-09-14	14216	1812	30	75	71	159	0.593	1167	4.26268	5.0689	7.50219	7.06219	-3.63636	16.7	2.81541	3.4012	4.31749
2020-09-15	14050	1724	30	71	89	168	0.562	1125	4.48864	5.12396	7.4524	7.02554	5.66038	16.8	2.82138	3.4012	4.26268
2020-09-16	13360	1615	29	75	106	177	0.591	1186	4.66344	5.17615	7.38709	7.07834	5.35714	16.8	2.82138	3.3673	4.31749
2020-09-17	13673	1593	30	75	76	162	0.631	1196	4.33073	5.0876	7.37337	7.08674	-8.47458	16.7	2.81541	3.4012	4.31749
2020-09-18	12730	1541	30	72	68	157	0.535	1178	4.21951	5.05625	7.34019	7.07157	-3.08642	16.9	2.82731	3.4012	4.27667
2020-09-19	13170	1567	29	75	93	170	0.574	1185	4.5326	5.1358	7.35692	7.0775	8.28025	16.7	2.81541	3.3673	4.31749
2020-09-20	11591	1544	30	75	95	171	0.622	1163	4.55388	5.14166	7.34213	7.05876	0.588235	16.4	2.79728	3.4012	4.31749
2020-09-21	13053	1705	29	76	112	180	0.593	1145	4.7185	5.19296	7.44132	7.04316	5.26316	16.4	2.79728	3.3673	4.33073
2020-09-22	14164	1557	30	75	40	112	0.562	1167	3.68888	4.7185	7.35052	7.06219	-37.7778	16.3	2.79117	3.4012	4.31749
2020-09-23	14150	1666	30	75	86	167	0.591	1125	4.45435	5.11799	7.41818	7.02554	49.1071	15.2	2.7213	3.4012	4.31749
2020-09-24	12900	1540	30	78	89	168	0.591	1111	4.48864	5.12396	7.33954	7.01302	0.598802	16.1	2.77882	3.4012	4.35671
2020-09-25	12473	1383	29	75	75	161	0.588	1258	4.31749	5.0814	7.23201	7.13728	-4.16667	15.6	2.74727	3.3673	4.31749
2020-09-26	10765	1106	30	75	67	157	0.554	1169	4.20469	5.05625	7.00851	7.0639	-2.48447	15.2	2.7213	3.4012	4.31749
2020-09-27	10685	1275	30	75	81	164	0.559	1174	4.39445	5.09987	7.1507	7.06817	4.4586	15.4	2.73437	3.4012	4.31749
2020-09-28	11922	1407	30	77	123	186	0.652	1189	4.81218	5.22575	7.24922	7.08087	13.4146	14.4	2.66723	3.4012	4.34381
2020-09-29	12869	1488	29	75	120	184	0.601	1153	4.78749	5.21494	7.30519	7.05012	-1.07527	14.5	2.67415	3.3673	4.31749
2020-09-30	13404	1436	30	75	147	198	0.609	1196	4.99043	5.28827	7.26962	7.08674	7.6087	14.8	2.69463	3.4012	4.31749
2020-10-01	11420	1508	29	74	142	196	0.591	1178	4.95583	5.27811	7.31854	7.07157	-1.0101	12.4	2.5177	3.3673	4.30407
2020-10-02	11176	1396	29	71	149	199	0.591	1185	5.00395	5.2933	7.24137	7.0775	1.53061	12.8	2.54945	3.3673	4.26268
2020-10-03	9554	1182	29	71	105	177	0.588	1163	4.65396	5.17615	7.07496	7.05876	-11.0553	12.9	2.55723	3.3673	4.26268
2020-10-04	9859	1125	29	75	122	185	0.554	1145	4.80402	5.22036	7.02554	7.04316	4.51977	12.8	2.54223	3.3673	4.31749
2020-10-05	11767	1442	29	71	116	182	0.559	1167	4.75359	5.20401	7.27379	7.06219	-1.62162	12.4	2.5177	3.3673	4.26268
2020-10-06	12345	1499	29	71	121	185	0.652	1125	4.79579	5.22036	7.31255	7.02554	1.64835	12.1	2.49321	3.3673	4.26268
2020-10-07	13032	1520	28	76	108	178	0.587	1186	4.68213	5.18178	7.32647	7.07834	-3.78378	12.4	2.5177	3.3322	4.33073
2020-10-08	12605	1441	29	71	117	183	0.573	1196	4.76217	5.20949	7.27309	7.08674	2.80899	12.7	2.5416	3.3673	4.26268
2020-10-09	11256	1278	29	71	111	180	0.632	1185	4.70953	5.19296	7.15305	7.0775	-1.63934	12.9	2.55723	3.3673	4.26268
2020-10-10	10859	1203	30	77	139	194	0.613	1163	4.93447	5.26786	7.09257	7.05876	7.77778	12.4	2.5177	3.4012	4.34381
2020-10-11	9467	1193	29	71	151	201	0.62	1145	5.01728	5.3033	7.08423	7.04316	3.60825	12.5	2.52573	3.3673	4.26268
2020-10-12	13227	1472	30	71	150	200	0.538	1167	5.01064	5.29832	7.29438	7.06219	-0.497512	12.6	2.5337	3.4012	4.26268
2020-10-13	13815	1537	29	70	148	199	0.586	1125	4.99721	5.2933	7.33759	7.02554	-0.5	11.4	2.43361	3.3673	4.2485
2020-10-14	14411	1684	29	71	167	217	0.554	1186	5.11799	5.3799	7.42893	7.07834	9.04523	11.9	2.47654	3.3673	4.26268
2020-10-15	14104	1600	28	71	165	215	0.559	1196	5.10595	5.37064	7.37776	7.08674	-0.921659	11.5	2.44235	3.3322	4.26268
2020-10-16	13577	1527	28	71	184	234	0.652	1178	5.21494	5.45532	7.33106	7.07157	8.83721	11.7	2.45959	3.3322	4.26268
2020-10-17	11573	1209	28	74	143	196	0.587	1185	4.96284	5.27811	7.09755	7.0775	-16.2393	11.8	2.4681	3.3322	4.30407
2020-10-18	11866	1274	28	71	146	198	0.573	1163	4.98361	5.28827	7.14992	7.05876	1.02041	10.7	2.37024	3.3322	4.26268
2020-10-19	15146	1637	28	71	158	208	0.632	1145	5.0626	5.33754	7.40062	7.04316	5.05051	11.2	2.41591	3.3322	4.26268
2020-10-20	13611	1380	27	72	131	190	0.559	1167	4.8752	5.24702	7.22984	7.06219	-8.65385	10.8	2.37955	3.29584	4.27667
2020-10-21	14086	1545	28	71	146	198	0.652	1125	4.98361	5.28827	7.34278	7.02554	4.21053	10.9	2.38876	3.3322	4.26268
2020-10-22	14958	1696	28	71	96	172	0.587	1111	4.56435	5.14749	7.43603	7.01302	-13.1313	10.7	2.37024	3.3322	4.26268
2020-10-23	14119	1586	27	75	52	142	0.573	1178	3.95124	4.95583	7.36897	7.07157	-17.4419	10.5	2.35138	3.29584	4.31749
2020-10-24	10998	1094	28	71	37	105	0.632	1185	3.61092	4.65396	6.9976	7.0775	-26.0563	10.4	2.34181	3.3322	4.26268
2020-10-25	11103	1308	28	71	72	160	0.613	1163	4.27667	5.07517	7.17625	7.05876	52.381	10.2	2.32239	3.3322	4.26268
2020-10-26	13758	1436	28	74	88	168	0.62	1145	4.47734	5.12396	7.26962	7.04316	5	11.1	2.40695	3.3322	4.30407
2020-10-27	12617	1335	27	71	174	228	0.538	1167	5.15906	5.42935	7.19669	7.06219	35.7143	11.2	2.41591	3.29584	4.26268
2020-10-28	12357	1493	28	71	170	220	0.586	1125	5.1358	5.39363	7.30854	7.02554	-3.50877	11.4	2.43361	3.3322	4.26268
2020-10-29	14268	1681	28	74	141	195	0.554	1186	4.94876	5.273	7.42714	7.07834	-11.3636	10.5	2.35138	3.3322	4.30407
2020-10-30	14141	1604	26	71	123	186	0.559	1196	4.81218	5.22575	7.38026	7.08674	-4.61538	10.6	2.36085	3.2581	4.26268
2020-10-31	11532	1320	28	71	118	183	0.605	1185	4.77068	5.20949	7.18539	7.0775	-1.6129	10.8	2.37955	3.3322	4.26268
2020-11-01	12549	1568	27	54	110	179	0.689	1163	4.70048	5.18739	7.35756	7.05876	-2.18579	10.5	2.35138	3.29584	3.98898
2020-11-02	12891	1736	27	57	75	161	0.61	1145	4.31749	5.0814	7.45934	7.04316	-10.0559	10.7	2.37024	3.29584	4.04305
2020-11-03	14061	1659	27	54	111	180	0.591	1167	4.70953	5.19296	7.41397	7.06219	11.8012	10.4	2.34181	3.29584	3.98898
2020-11-04	13914	1517	28	60	114	181	0.644	1125	4.7362	5.1985	7.32449	7.02554	0.555556	10.8	2.37955	3.3322	4.09434
2020-11-05	15225	1842	27	54	200	250	0.631	1186	5.29832	5.52146	7.51861	7.07834	38.1215	11.9	2.47654	3.29584	3.98898
2020-11-06	13521	1469	27	54	197	247	0.622	1196	5.2832	5.50939	7.29234	7.08674	-1.2	11.3	2.4248	3.29584	3.98898
2020-11-07	11419	1289	27	64	190	240	0.593	1178	5.24702	5.48064	7.16162	7.07157	-2.83401	11.5	2.44235	3.29584	4.15888
2020-11-08	12760	1474	27	54	165	215	0.562	1125	5.10595	5.37064	7.29574	7.02554	-10.4167	11.8	2.4681	3.29584	3.98898
2020-11-09	14042	1683	26	54	138	194	0.591	1186	4.92725	5.26786	7.42833	7.07834	-9.76744	11.9	2.47654	3.2581	3.98898
2020-11-10	13520	1699	27	62	112	180	0.631	1196	4.7185	5.19296	7.4378	7.08674	-7.21649	10.4	2.34181	3.29584	4.12713
2020-11-11	14524	1733	27	54	115	182	0.632	1178	4.74493	5.20401	7.45761	7.07157	1.11111	10.5	2.35138	3.29584	3.98898
2020-11-12	17112	1845	27	54	118	183	0.559	1185	4.77068	5.20949	7.52023	7.0775	0.549451	10.7	2.37024	3.29584	3.98898
2020-11-13	13539	1767	26	54	138	194	0.652	1163	4.92725	5.26786	7.47704	7.05876	6.01093	10.5	2.35138	3.2581	3.98898
2020-11-14	11795	1531	28	56	136	193	0.587	1145	4.91265	5.26269	7.33368	7.04316	-0.515464	10.9	2.38876	3.3322	4.02535
2020-11-15	14060	1837	27	54	143	196	0.573	1167	4.96284	5.27811	7.51589	7.06219	1.5544	10.8	2.37955	3.29584	3.98898
2020-11-16	15768	2139	27	54	162	212	0.632	1125	5.0876	5.35659	7.66809	7.02554	8.16327	10.2	2.32239	3.29584	3.98898
2020-11-17	15990	2212	28	57	203	253	0.613	1111	5.31321	5.53339	7.70165	7.01302	19.3396	10	2.30259	3.3322	4.04305
2020-11-18	16469	2111	26	54	167	217	0.62	1178	5.11799	5.3799	7.65492	7.07157	-14.2292	10.1	2.31254	3.2581	3.98898
2020-11-19	17531	2364	27	54	207	257	0.538	1185	5.33272	5.54908	7.76811	7.0775	18.4332	10.3	2.33214	3.29584	3.98898
2020-11-20	15607	2275	25	57	224	274	0.652	1163	5.41165	5.61313	7.72974	7.05876	6.61479	9.6	2.26176	3.21888	4.04305
2020-11-21	12643	1847	26	54	230	280	0.587	1178	5.43808	5.63479	7.52132	7.07157	2.18978	12.3	2.5096	3.2581	3.98898
2020-11-22	13870	2060	26	54	218	268	0.573	1185	5.3845	5.59099	7.63046	7.0775	-4.28571	11.5	2.44235	3.2581	3.98898
2020-11-23	16059	2419	25	58	180	230	0.632	1163	5.19296	5.43808	7.79111	7.05876	-14.1791	10.5	2.35138	3.21888	4.06044
2020-11-24	15018	2230	25	54	197	247	0.613	1145	5.2832	5.50939	7.70976	7.04316	7.3913	11.8	2.4681	3.21888	3.98898
2020-11-25	16001	2156	25	54	193	243	0.62	1167	5.26269	5.49306	7.67601	7.06219	-1.61943	12.3	2.5096	3.21888	3.98898
2020-11-26	17052	2292	24	54	171	221	0.538	1125	5.14166	5.39816	7.73718	7.02554	-9.0535	11.4	2.43361	3.17805	3.98898
2020-11-27	16378	2273	24	59	162	212	0.586	1111	5.0876	5.35659	7.72886	7.01302	-4.0724	12.9	2.55723	3.17805	4.07754
2020-11-28	14012	1908	25	54	176	226	0.672	1178	5.17048	5.42053	7.55381	7.07157	6.60377	11.8	2.4681	3.21888	3.98898
2020-11-29	13737	1788	24	54	172	222	0.614	1185	5.14749	5.40268	7.48885	7.0775	-1.76991	10.4	2.34181	3.17805	3.98898
2020-11-30	15372	2525	24	59	178	228	0.632	1163	5.18178	5.42935	7.834	7.05876	2.7027	11.2	2.41591	3.17805	4.07754
2020-12-01	15501	2293	23	46	185	235	0.648	1196	5.22036	5.45959	7.73762	7.08674	3.07018	10.5	2.35138	3.13549	3.82864
2020-12-02	15972	2198	23	48	202	252	0.61	1178	5.30827	5.52943	7.6953	7.07157	7.23404	11.3	2.4248	3.13549	3.8712
2020-12-03	16807	2316	24	46	214	264	0.695	1185	5.36598	5.57595	7.7476	7.0775	4.7619	10.3	2.33214	3.17805	3.82864
2020-12-04	15430	2252	23	45	231	281	0.596	1163	5.44242	5.63835	7.71957	7.05876	6.43939	11.4	2.43361	3.13549	3.80666
2020-12-05	13540	1888	23	46	259	309	0.596	1145	5.55683	5.73334	7.54327	7.04316	9.96441	10.5	2.35138	3.13549	3.82864
2020-12-06	13218	1666	22	46	310	360	0.596	1167	5.73657	5.8861	7.41818	7.06219	16.5049	11.6	2.45101	3.09104	3.82864
2020-12-07	14369	2198	23	47	253	303	0.649	1125	5.53339	5.71373	7.6953	7.02554	-15.8333	10.8	2.37955	3.13549	3.85015
2020-12-08	17084	2202	22	46	219	269	0.635	1111	5.38907	5.59471	7.69712	7.01302	-11.2211	11.4	2.43361	3.09104	3.82864
2020-12-09	17042	2159	22	46	208	258	0.631	1178	5.33754	5.55296	7.6774	7.07157	-4.08922	10.5	2.35138	3.09104	3.82864
2020-12-10	16265	1861	20	49	231	281	0.535	1185	5.44242	5.63835	7.52887	7.0775	8.91473	11.6	2.45101	2.99573	3.89182
2020-12-11	16323	1884	20	46	185	235	0.574	1163	5.22036	5.45959	7.54115	7.05876	-16.3701	10.7	2.37024	2.99573	3.82864
2020-12-12	12630	1329	19	50	189	239	0.622	1178	5.24175	5.47646	7.19218	7.07157	1.70213	11.6	2.45101	2.94444	3.91202
2020-12-13	12748	1355	19	46	217	267	0.593	1185	5.3799	5.58725	7.21156	7.0775	11.7155	10.4	2.34181	2.94444	3.82864
2020-12-14	16828	1799	19	46	244	294	0.562	1163	5.49717	5.68358	7.49499	7.05876	10.1124	10.2	2.32239	2.94444	3.82864
2020-12-15	19054	1877	20	46	269	319	0.591	1145	5.59471	5.76519	7.53743	7.04316	8.5034	11.3	2.4248	2.99573	3.82864
2020-12-16	17025	1632	20	52	226	276	0.591	1167	5.42053	5.6204	7.39756	7.06219	-13.4796	11.7	2.45959	2.99573	3.95124
2020-12-17	13191	1134	20	46	206	256	0.588	1125	5.32788	5.54518	7.03351	7.02554	-7.24638	11.4	2.43361	2.99573	3.82864
2020-12-18	14336	1318	18	46	233	283	0.554	1111	5.45104	5.64545	7.18387	7.01302	10.5469	11.5	2.44235	2.89037	3.82864
2020-12-19	12300	1267	18	54	207	257	0.559	1178	5.33272	5.54908	7.14441	7.07157	-9.18728	11.8	2.4681	2.89037	3.98898
2020-12-20	13316	1153	19	46	197	247	0.652	1167	5.2832	5.50939	7.05012	7.06219	-3.89105	11.4	2.43361	2.94444	3.82864
2020-12-21	15669	1470	18	46	267	217	0.601	1125	5.58725	5.3799	7.29302	7.02554	-12.1457	10.2	2.32239	2.89037	3.82864
2020-12-22	15145	1318	18	57	264	314	0.609	1111	5.57595	5.74939	7.18387	7.01302	44.7005	10.6	2.36085	2.89037	4.04305
2020-12-23	15932	1367	17	46	273	323	0.627	1178	5.60947	5.77765	7.22037	7.07157	2.86624	10.8	2.37955	2.83321	3.82864
2020-12-24	13227	1234	16	50	284	334	0.643	1185	5.64897	5.81114	7.11802	7.0775	3.40557	10.4	2.34181	2.77259	3.91202
2020-12-25	13695	1163	16	46	236	286	0.605	1163	5.46383	5.65599	7.05876	7.05876	-14.3713	10.5	2.35138	2.77259	3.82864
2020-12-26	9912	834	17	47	197	247	0.689	1196	5.2832	5.50939	6.72623	7.08674	-13.6364	10.9	2.38876	2.83321	3.85015
2020-12-27	12650	1049	16	46	213	263	0.61	1178	5.36129	5.57215	6.95559	7.07157	6.47773	10.4	2.34181	2.77259	3.82864
2020-12-28	12617	932	15	46	226	276	0.591	1185	5.42053	5.6204	6.83733	7.0775	4.94297	10.8	2.37955	2.70805	3.82864
2020-12-29	14588	1181	14	48	262	312	0.644	1163	5.56834	5.743	7.07412	7.05876	13.0435	10.2	2.32239	2.63906	3.8712
2020-12-30	15229	1235	15	49	257	307	0.631	1145	5.54908	5.72685	7.11883	7.04316	-1.60256	10.2	2.32239	2.70805	3.89182
2020-12-31	13254	1014	15	46	223	273	0.622	1167	5.40717	5.60947	6.92166	7.06219	-11.0749	10	2.30259	2.70805	3.82864
2021-01-01	12103	990	15	42	226	276	0.593	1125	5.42053	5.6204	6.8977	7.02554	1.0989	9.3	2.23001	2.70805	3.73767
2021-01-02	9701	684	13	40	214	264	0.562	1111	5.36598	5.57595	6.52796	7.01302	-4.34783	9.1	2.20827	2.56495	3.68888
2021-01-03	10925	835	14	43	199	249	0.591	1178	5.2933	5.51745	6.72743	7.07157	-5.68182	9.4	2.24071	2.63906	3.7612
2021-01-04	12096	910	15	40	208	258	0.631	1185	5.33754	5.55296	6.81344	7.0775	3.61446	9.6	2.26176	2.70805	3.68888
2021-01-05	14462	991	14	44	244	294	0.535	1163	5.49717	5.68358	6.89871	7.05876	13.9535	9.4	2.24071	2.63906	3.78419
2021-01-06	15544	978	12	40	240	290	0.574	1178	5.48064	5.66988	6.88551	7.07157	-1.36054	9.4	2.24071	2.48491	3.68888
2021-01-07	15381	1007	14	45	245	295	0.622	1178	5.50126	5.68698	6.91473	7.07157	1.72414	9.2	2.2192	2.63906	3.80666
2021-01-08	13681	785	13	40	277	327	0.593	1167	5.62402	5.78996	6.66568	7.06219	10.8475	9	2.19722	2.56495	3.68888
2021-01-09	12908	692	12	40	239	289	0.562	1125	5.47646	5.66643	6.53959	7.02554	-11.6208	9.7	2.27213	2.48491	3.68888
2021-01-10	12920	1071	14	46	247	297	0.591	1111	5.50939	5.69373	6.97635	7.01302	2.76817	9.4	2.24071	2.63906	3.82864
2021-01-11	14097	849	15	40	308	258	0.591	1178	5.7301	5.55296	6.74406	7.07157	-13.1313	9.5	2.25129	2.70805	3.68888
2021-01-12	14363	718	12	39	312	362	0.588	1185	5.743	5.89164	6.57647	7.0775	40.3101	9.7	2.27213	2.48491	3.66356
2021-01-13	15727	890	14	40	250	300	0.554	1163	5.52146	5.70378	6.79122	7.05876	-17.1271	8.6	2.15176	2.63906	3.68888
2021-01-14	16608	813	13	40	212	262	0.559	1196	5.35659	5.56834	6.70073	7.08674	-12.6667	8.2	2.10413	2.56495	3.68888
2021-01-15	13678	762	13	38	231	281	0.652	1178	5.44242	5.63835	6.63595	7.07157	7.25191	8.1	2.09186	2.56495	3.63759
2021-01-16	12215	578	13	40	229	279	0.601	1185	5.43372	5.63121	6.35957	7.0775	-0.711744	8.6	2.15176	2.56495	3.68888
2021-01-17	13446	569	12	41	301	351	0.609	1163	5.70711	5.86079	6.34388	7.05876	25.8065	8.5	2.14007	2.48491	3.71357
2021-01-18	12707	697	13	40	314	364	0.591	1145	5.74939	5.89715	6.54679	7.04316	3.7037	8.4	2.12823	2.56495	3.68888
2021-01-19	15097	702	14	42	293	243	0.591	1167	5.68017	5.49306	6.55393	7.06219	-33.2418	8.3	2.11626	2.63906	3.73767
2021-01-20	15410	656	12	40	365	415	0.588	1125	5.8999	6.02828	6.48616	7.02554	70.7819	9.1	2.20827	2.48491	3.68888
2021-01-21	14761	584	11	40	353	403	0.554	1111	5.86647	5.99894	6.3699	7.01302	-2.89157	9.3	2.23001	2.3979	3.68888
2021-01-22	14846	619	12	42	304	354	0.559	1178	5.71703	5.8693	6.42811	7.07157	-12.1588	9.7	2.27213	2.48491	3.73767
2021-01-23	11115	436	11	40	268	318	0.652	1185	5.59099	5.76205	6.07764	7.0775	-10.1695	9.8	2.28238	2.3979	3.68888
2021-01-24	14169	473	12	40	252	302	0.587	1163	5.52943	5.71043	6.1591	7.05876	-5.03145	9.4	2.24071	2.48491	3.68888
2021-01-25	14829	602	10	42	287	337	0.573	1178	5.65948	5.82008	6.40026	7.07157	11.5894	9.4	2.24071	2.30259	3.73767
2021-01-26	14401	515	14	40	255	305	0.632	1178	5.54126	5.72031	6.24417	7.07157	-9.49555	9.4	2.24071	2.63906	3.68888
2021-01-27	15720	528	12	41	270	320	0.613	1167	5.59842	5.76832	6.2691	7.06219	4.91803	9.7	2.27213	2.48491	3.71357
2021-01-28	14830	509	13	40	229	279	0.62	1125	5.43372	5.63121	6.23245	7.02554	-12.8125	8.2	2.10413	2.56495	3.68888
2021-01-29	12075	454	14	41	251	301	0.538	1111	5.52545	5.70711	6.1181	7.01302	7.8853	8.6	2.15176	2.63906	3.71357
2021-01-30	12084	363	15	40	248	298	0.586	1178	5.51343	5.69709	5.8944	7.07157	-0.996678	8.7	2.16332	2.70805	3.68888
2021-01-31	12225	369	15	40	230	280	0.554	1185	5.43808	5.63479	5.9108	7.0775	-6.04027	8.4	2.12823	2.70805	3.68888
2021-02-01	12475	443	14	34	285	335	0.559	1163	5.65249	5.81413	6.09357	7.05876	19.6429	8.9	2.18605	2.63906	3.52636
2021-02-02	14452	525	15	34	261	311	0.652	1196	5.56452	5.73979	6.2634	7.08674	-7.16418	8.1	2.09186	2.70805	3.52636
2021-02-03	14985	438	15	34	251	301	0.587	1178	5.52545	5.70711	6.08222	7.07157	-3.21543	8.7	2.16332	2.70805	3.52636
2021-02-04	15273	485	16	34	233	283	0.573	1185	5.45104	5.64545	6.18415	7.0775	-5.98007	8.6	2.15176	2.77259	3.52636
2021-02-05	15566	435	17	32	241	291	0.601	1163	5.4848	5.67332	6.07535	7.05876	2.82686	8.9	2.18605	2.83321	3.46574
2021-02-06	12135	305	15	34	222	272	0.609	1145	5.40268	5.6058	5.72031	7.04316	-6.52921	8.2	2.10413	2.70805	3.52636
2021-02-07	12404	292	16	34	214	264	0.627	1167	5.36598	5.57595	5.67675	7.06219	-2.94118	8.6	2.15176	2.77259	3.52636
2021-02-08	13762	316	17	35	180	230	0.643	1196	5.19296	5.43808	5.75574	7.08674	-12.8788	8.7	2.16332	2.83321	3.55535
2021-02-09	14468	378	15	36	178	228	0.605	1178	5.18178	5.42935	5.93489	7.07157	-0.869565	7.7	2.04122	2.70805	3.58352
2021-02-10	14999	388	16	31	184	234	0.689	1185	5.21494	5.45532	5.96101	7.0775	2.63158	7.8	2.05412	2.77259	3.43399
2021-02-11	15776	418	15	32	225	275	0.61	1163	5.4161	5.61677	6.03548	7.05876	17.5214	7.9	2.06686	2.70805	3.46574
2021-02-12	14328	404	18	33	265	315	0.591	1145	5.57973	5.75257	6.00141	7.04316	14.5455	8.4	2.12823	2.89037	3.49651
2021-02-13	12871	291	19	34	309	359	0.644	1167	5.73334	5.88332	5.67332	7.06219	13.9683	8.1	2.09186	2.94444	3.52636
2021-02-14	12900	326	18	35	276	326	0.631	1125	5.6204	5.7869	5.7869	7.02554	-9.1922	8.3	2.11626	2.89037	3.55535
2021-02-15	14138	446	18	32	310	360	0.622	1111	5.73657	5.8861	6.10032	7.01302	10.4294	9.8	2.28238	2.89037	3.46574
2021-02-16	14788	396	19	33	314	364	0.593	1178	5.74939	5.89715	5.98141	7.07157	1.11111	9.7	2.27213	2.94444	3.49651
2021-02-17	16612	443	19	34	297	347	0.562	1185	5.69373	5.84932	6.09357	7.0775	-4.67033	9.8	2.28238	2.94444	3.52636
2021-02-18	14603	391	20	35	238	288	0.591	1163	5.47227	5.66296	5.96871	7.05876	-17.0029	9.7	2.27213	2.99573	3.55535
2021-02-19	14232	406	21	31	256	306	0.631	1178	5.54518	5.72359	6.00635	7.07157	6.25	9.4	2.24071	3.04452	3.43399
2021-02-20	11148	350	19	32	212	262	0.554	1178	5.35659	5.56834	5.85793	7.07157	-14.3791	9.7	2.27213	2.94444	3.46574
2021-02-21	14036	327	21	33	203	253	0.559	1167	5.31321	5.53339	5.78996	7.06219	-3.43511	8.6	2.15176	3.04452	3.49651
2021-02-22	11103	366	20	34	200	250	0.652	1125	5.29832	5.52146	5.90263	7.02554	-1.18577	9	2.19722	2.99573	3.52636
2021-02-23	12748	399	19	35	201	251	0.587	1111	5.3033	5.52545	5.98896	7.01302	0.4	8.7	2.16332	2.94444	3.55535
2021-02-24	16152	428	21	34	222	272	0.573	1178	5.40268	5.6058	6.05912	7.07157	8.36653	7.6	2.02815	3.04452	3.52636
2021-02-25	15560	410	22	31	296	346	0.601	1185	5.69036	5.84644	6.01616	7.0775	27.2059	9.8	2.28238	3.09104	3.43399
2021-02-26	15032	470	21	35	284	334	0.609	1163	5.64897	5.81114	6.15273	7.05876	-3.46821	8.8	2.17475	3.04452	3.55535
2021-02-27	12348	407	20	36	193	243	0.627	1196	5.26269	5.49306	6.00881	7.08674	-27.2455	7.7	2.04122	2.99573	3.58352
2021-02-28	13411	385	21	32	186	236	0.643	1167	5.22575	5.46383	5.95324	7.06219	-2.88066	9.9	2.29253	3.04452	3.46574
2021-03-01	13570	585	22	34	163	213	0.605	1125	5.09375	5.36129	6.37161	7.02554	-9.74576	9.1	2.20827	3.09104	3.52636
2021-03-02	15325	515	23	32	169	219	0.689	1111	5.1299	5.38907	6.24417	7.01302	2.8169	8.5	2.14007	3.13549	3.46574
2021-03-03	16414	614	23	33	177	227	0.587	1178	5.17615	5.42495	6.41999	7.07157	3.65297	8.7	2.16332	3.13549	3.49651
2021-03-04	15985	619	25	34	188	238	0.573	1185	5.23644	5.47227	6.42811	7.0775	4.84581	8.6	2.15176	3.21888	3.52636
2021-03-05	13710	635	25	50	210	260	0.601	1163	5.34711	5.56068	6.45362	7.05876	9.2437	8.4	2.12823	3.21888	3.91202
2021-03-06	13082	540	24	52	181	231	0.609	1196	5.1985	5.44242	6.29157	7.08674	-11.1538	9	2.19722	3.17805	3.95124
2021-03-07	14092	606	24	53	156	206	0.627	1178	5.04986	5.32788	6.40688	7.07157	-10.8225	11.3	2.4248	3.17805	3.97029
2021-03-08	16958	845	23	53	171	221	0.643	1185	5.14166	5.39816	6.73934	7.0775	7.28155	11.4	2.43361	3.13549	3.97029
2021-03-09	17775	912	25	58	201	251	0.605	1163	5.3033	5.52545	6.81564	7.05876	13.5747	11.8	2.4681	3.21888	4.06044
2021-03-10	17032	1018	26	56	159	209	0.593	1145	5.0689	5.34233	6.9256	7.04316	-16.7331	11.9	2.47654	3.2581	4.02535
2021-03-11	18058	1054	26	55	144	197	0.562	1167	4.96981	5.2832	6.96035	7.06219	-5.74163	11.4	2.43361	3.2581	4.00733
2021-03-12	16111	1066	25	53	175	225	0.591	1196	5.16479	5.4161	6.97167	7.08674	14.2132	11.2	2.41591	3.21888	3.97029
2021-03-13	16206	1014	26	54	225	275	0.631	1178	5.4161	5.61677	6.92166	7.07157	22.2222	12.3	2.5096	3.2581	3.98898
2021-03-14	16206	1159	26	55	209	259	0.554	1185	5.34233	5.55683	7.05531	7.0775	-5.81818	12.4	2.5177	3.2581	4.00733
2021-03-15	18695	1773	26	56	172	222	0.559	1163	5.14749	5.40268	7.48043	7.05876	-14.2857	13.1	2.57261	3.2581	4.02535
2021-03-16	20748	1719	27	51	212	262	0.652	1145	5.35659	5.56834	7.4495	7.04316	18.018	14.6	2.68102	3.29584	3.93183
2021-03-17	24275	1865	27	53	345	395	0.587	1167	5.84354	5.97889	7.53102	7.06219	50.7634	15.4	2.73437	3.29584	3.97029
2021-03-18	20925	2187	27	57	213	263	0.573	1125	5.36129	5.57215	7.69029	7.02554	-33.4177	16	2.77259	3.29584	4.04305
2021-03-19	18917	1899	28	52	282	332	0.601	1111	5.64191	5.80513	7.54908	7.01302	26.2357	17.9	2.8848	3.3322	3.95124
2021-03-20	19900	1869	28	52	291	341	0.609	1178	5.67332	5.83188	7.53316	7.07157	2.71084	17.8	2.8792	3.3322	3.95124
2021-03-21	21108	2172	29	53	352	402	0.627	1185	5.86363	5.99645	7.6834	7.0775	17.8886	18.9	2.93916	3.3673	3.97029
2021-03-22	25111	2809	29	54	245	295	0.643	1163	5.50126	5.68698	7.94058	7.05876	-26.6169	19.3	2.96011	3.3673	3.98898
2021-03-23	25954	3509	29	55	197	274	0.605	1178	5.2832	5.61313	8.16309	7.07157	-7.11864	18.4	2.91235	3.3673	4.00733
2021-03-24	27502	3567	30	51	249	299	0.689	1265	5.51745	5.70044	8.17948	7.14283	9.12409	19.3	2.96011	3.4012	3.93183
2021-03-25	27045	3587	30	52	193	243	0.587	1200	5.26269	5.49306	8.18507	7.09008	-18.7291	18.9	2.93916	3.4012	3.95124
2021-03-26	27299	3737	30	53	161	211	0.609	1205	5.0814	5.35186	8.22604	7.09423	-13.1687	19.8	2.98568	3.4012	3.97029
2021-03-27	24664	3674	30	54	190	240	0.627	1207	5.24702	5.48064	8.20904	7.09589	13.7441	20.1	3.00072	3.4012	3.98898
2021-03-28	22136	3908	30	55	180	240	0.643	1211	5.19296	5.48064	8.27078	7.0992	0	22.3	3.10459	3.4012	4.00733
2021-03-29	28195	5181	30	54	160	240	0.605	1256	5.07517	5.48064	8.55275	7.13569	0	20.1	3.00072	3.4012	3.98898
2021-03-30	26620	5042	30	58	175	240	0.689	1209	5.16479	5.48064	8.52556	7.09755	0	22.5	3.11352	3.4012	4.06044
2021-03-31	26931	5358	30	54	190	240	0.587	1225	5.24702	5.48064	8.58635	7.1107	0	23.4	3.15274	3.4012	3.98898
2021-04-01	28191	6469	32	71	160	210	0.573	1227	5.07517	5.34711	8.77478	7.11233	-12.5	22.5	3.11352	3.46574	4.26268
2021-04-02	30293	6830	32	74	160	210	0.601	1254	5.07517	5.34711	8.82908	7.13409	0	22.4	3.10906	3.46574	4.30407
2021-04-03	24100	5683	31	74	172	222	0.609	1241	5.14749	5.40268	8.64523	7.12367	5.71429	22.3	3.10459	3.43399	4.30407
2021-04-04	30724	7087	31	74	181	231	0.627	1231	5.1985	5.44242	8.86602	7.11558	4.05405	22.4	3.10906	3.43399	4.30407
2021-04-05	30239	7075	29	64	196	246	0.643	1242	5.27811	5.50533	8.86432	7.12448	6.49351	22.1	3.09558	3.3673	4.15888
2021-04-06	34311	7213	31	65	178	228	0.605	1256	5.18178	5.42935	8.88364	7.13569	-7.31707	22.5	3.11352	3.43399	4.17439
2021-04-07	34630	7626	33	63	203	253	0.593	1245	5.31321	5.53339	8.93932	7.12689	10.9649	22.1	3.09558	3.49651	4.14313
2021-04-08	33193	6854	32	71	281	331	0.562	1206	5.63835	5.80212	8.83259	7.09506	30.83	22.8	3.12676	3.46574	4.26268
2021-04-09	31654	7462	32	65	200	250	0.591	1209	5.29832	5.52146	8.91758	7.09755	-24.4713	22.7	3.12236	3.46574	4.17439
2021-04-10	26077	5343	32	75	190	240	0.631	1289	5.24702	5.48064	8.58354	7.16162	-4	22.6	3.11795	3.46574	4.31749
2021-04-11	29376	5819	33	73	185	235	0.554	1289	5.22036	5.45959	8.66888	7.16162	-2.08333	22.4	3.10906	3.49651	4.29046
2021-04-12	34968	7201	33	69	173	223	0.559	1289	5.15329	5.40717	8.88198	7.16162	-5.10638	23.4	3.15274	3.49651	4.23411
2021-04-13	32955	6028	34	66	172	222	0.652	1289	5.14749	5.40268	8.70417	7.16162	-0.44843	23.1	3.13983	3.52636	4.18965
2021-04-14	24825	5185	35	66	150	200	0.587	1289	5.01064	5.29832	8.55353	7.16162	-9.90991	23	3.13549	3.55535	4.18965
